# Supplementary material for: Reduction-induced surface amorphization enhances the oxygen evolution activity in Co3O4
Source: Royal Society of Chemistry journal article supplement (doi:10.1039/c5ra00995b), 2015-01-01
Supplement: c5ra00995b1.pdf [file c5ra00995b1.pdf]

## Supporting information

### Reduction-induced Surface Amorphization Enhances Oxygen Evolution Activity in $\text{Co}_3\text{O}_4$

Xue Leng,<sup>a</sup> Qingcong Zeng,<sup>a</sup> Kuang-Hsu Wu,<sup>a</sup> Ian R. Gentle,<sup>a</sup> and Da-Wei Wang<sup>a,b\*</sup>

a. X. Leng, Q. Zeng, K. Wu, Prof. I. R. Gentle, Dr. D. W. Wang

School of Chemistry and Molecular Biosciences, The University of Queensland  
Brisbane, Queensland 4072, Australia

b. Dr D. W. Wang

School of Chemical Engineering, UNSW Australia (The University of New South Wales)  
UNSW Sydney, New South Wales 2052, Australia  
E-mail: da-wei.wang@unsw.edu.au

#### Experimental Section

All starting materials were used as purchased from Sigma Aldrich. Cobalt acetate ( $\text{Co}(\text{Ac})_2 \cdot 4\text{H}_2\text{O}$ ) was used as cobalt source, sodium carbonate ( $\text{Na}_2\text{CO}_3$ ) as the precipitant and ethylene glycol (EG) as the solvent.

A method reported in the literature was employed to synthesize  $\text{Co}_3\text{O}_4$ .<sup>[25]</sup> Typically, cobalt acetate and sodium carbonate were dissolved in EG and refluxed at 80 °C for one hour to harvest purple precipitates. Then these purple precipitates were then transformed to  $\text{Co}_3\text{O}_4$  nanopowders by calcination at 450 °C in air for four hours. To reform the surface of these as-prepared  $\text{Co}_3\text{O}_4$  nanopowders ( $\text{Co}_3\text{O}_4\text{-AP}$ ),  $\text{Co}_3\text{O}_4\text{-AP}$  was reduced at 320 °C under 5 vol%  $\text{H}_2 + \text{N}_2$  flow for one hour and then stored in air. This reformed sample is noted as  $\text{Co}_3\text{O}_4\text{-R}$ .

Thermogravimetry (TG) analysis was done by a Mettler Toledo TGA/DSC analyser under 5 vol%  $\text{H}_2 + \text{N}_2$  flow at a flow rate of 10 mL/min. The heating rate is 2 °C/min. Crystallographic information was investigated by powder X-ray diffraction (XRD, Bruker D8). X-ray photoelectron spectroscopy (XPS) data was recorded on a Kratos Axis ULTRA X-ray Photoelectron Spectrometer. The incident radiation was Monochromatic Al  $\text{K}\alpha$  X-rays. The binding energy of various elements was corrected with the C 1s level of the carbon contamination at 284.8 eV. Transition electron microscopy (TEM) images were taken by FEI F20 transmission electron microscope. Samples for TEM were prepared by drop-drying ethanol suspension onto copper grid. Specific surface area was measured by BET method on ASAP2010 (Micromeritics).

Electrochemical measurements were performed in 0.1 M KOH electrolyte by a CHI 900C bi-potentiostat. Working electrode was prepared as follows: 3 mg of catalysts were dispersed in 3 mL of saturated chitosan aqueous solution assisted by 30 min ultrasound sonication to form a homogeneous ink; then 12  $\mu\text{L}$  of the catalyst ink was cast onto the glassy carbon disk of a rotating ring-disk electrode (RRDE) with the loading  $\sim 0.1 \text{ mg}/\text{cm}^2$ . The counter electrode is a Pt wire.  $\text{Hg}/\text{HgO}$ , KOH (0.1 M) was used as the reference electrode. The potential was converted to reversible hydrogen electrode (RHE) and corrected with iR compensation (R is the electrolyte resistance

measured by Electrochemical impedance spectroscopy (EIS)). Overpotential was computed using  $\eta = E(\text{RHE}) - 1.23 \text{ V}$ . Linear sweep voltammogram (LSV) was recorded at a scanning rate of 10 mV/s under continuous rotation (1600 rpm), when a potential of 0.524 V was applied to the Pt ring. Tafel plot was obtained by recording the steady-state current at applied potentials descending in steps of 10 mV when the electrode was rotated at 1600 rpm. Cyclic voltammetry (CV) was recorded at a scanning rate of 30 mV/s. EIS was measured in a range of frequency from 100 kHz to 0.1 Hz with a 5mV ac amplitude.

| Table S1. XPS spectra fitting parameters and assignments.                                         |     |                                        |                                       |                                                                |
|---------------------------------------------------------------------------------------------------|-----|----------------------------------------|---------------------------------------|----------------------------------------------------------------|
|                                                                                                   |     | Co <sub>3</sub> O <sub>4</sub> -<br>AP | Co <sub>3</sub> O <sub>4</sub> -<br>R | Assignment                                                     |
| Co 2p <sub>3/2</sub>                                                                              | P1  | 779.5<br>(1.5) <sup>[a]</sup>          | 779.5<br>(1.6)                        | Co (3+)                                                        |
|                                                                                                   | P2  | 781<br>(1.7)                           | 780.9<br>(1.7)                        | Co (2+) ms                                                     |
|                                                                                                   | P3  | 782.5<br>(2.6)                         | 782.4<br>(2.6)                        | Co (2+) ms                                                     |
|                                                                                                   | S1  | 785.8<br>(3.1)                         | 785.7<br>(3.1)                        | Co (2+) ss                                                     |
|                                                                                                   | S2  | 789<br>(3.4)                           | 789<br>(3.4)                          | Co (3+) ss                                                     |
| O 1s                                                                                              | I   | 529.7                                  |                                       | oxide                                                          |
|                                                                                                   |     | 529.8                                  |                                       | oxide                                                          |
|                                                                                                   | II  | 531.3                                  |                                       | O <sup>-</sup> compensating for deficiencies in the subsurface |
|                                                                                                   |     | 531                                    |                                       | OH <sup>-</sup>                                                |
|                                                                                                   | III | 532.7                                  |                                       | Weakly adsorbed species on the surface                         |
| 532                                                                                               |     | CO <sub>3</sub> <sup>2-</sup>          |                                       |                                                                |
| C 1s                                                                                              | 1   | 284.8                                  | 284.8                                 | Carbon contamination C-C                                       |
|                                                                                                   | 2   | 286.2                                  | 286.3                                 | Carbon contamination C-O                                       |
|                                                                                                   | 3   | 288                                    |                                       | Carbon contamination C=O                                       |
|                                                                                                   |     | 288.8                                  |                                       | CO <sub>3</sub> <sup>2-</sup>                                  |
| [a] Binding energy (full width at half maximum)<br>ms: multiple splitting. ss: shake-up satellite |     |                                        |                                       |                                                                |

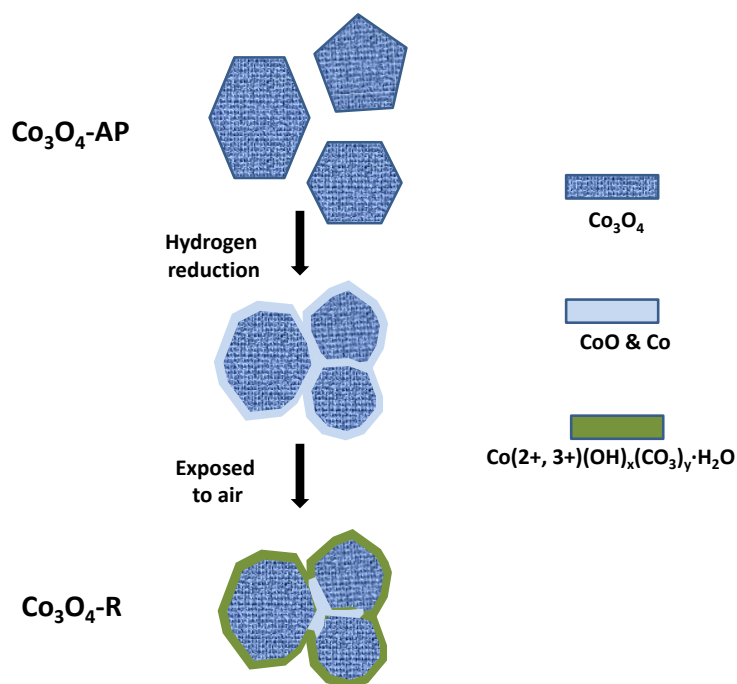

**Scheme S1.** Scheme of the surface reformation from  $\text{Co}_3\text{O}_4\text{-AP}$  to  $\text{Co}_3\text{O}_4\text{-R}$ .

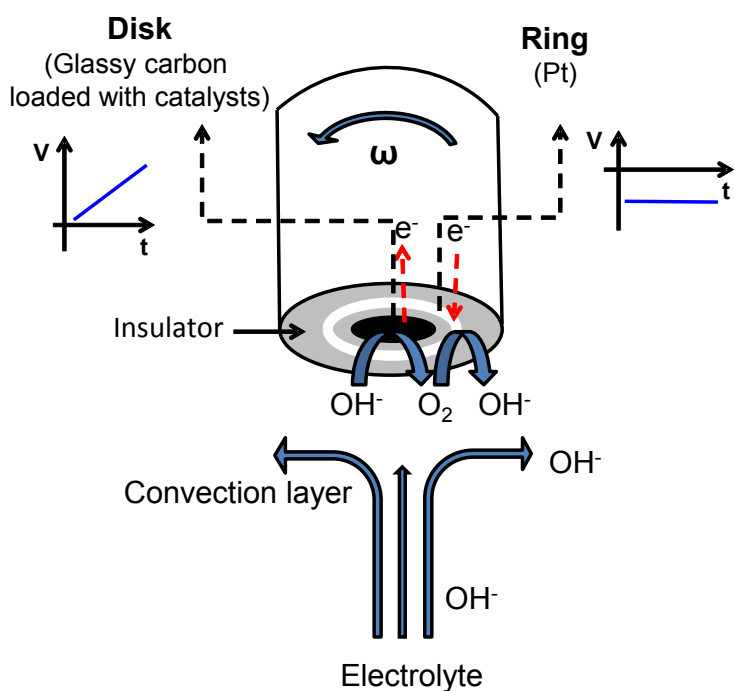

**Scheme S2.** The working principle of using ring electrode to detect the evolved oxygen species on disk electrode. A Pt ring electrode around the disk electrode was applied with a constant potential (0.524V) at which oxygen can be reduced. When OER occurs on the disk electrode, the evolved oxygen molecules are subsequently convected to the Pt ring electrode by flux and are reduced there. Therefore, the ring current is relevant to the quantity of oxygen evolved at the disk electrode and

can be used as a complementary factor to assess the OER activity without the interference of parallel parasitic Faradaic processes, such as the oxidation of cobalt.

### Calculation of turn-over frequency (TOF)

TOF is expressed as the number of oxygen molecules produced per Co atom per second. TOF was calculated from the current density at overpotential ( $\eta$ ) of 400 mV by assuming every Co atom was involved in OER catalysis (lower TOF limit).

$$\text{TOF} = (j/4F)/(m/M \cdot 3)$$

j: Current density at  $\eta = 400$  mV ( $\text{mA}/\text{cm}^2$ );

F: Faraday constant (96485.3 C/mol);

m: Loading (0.0955  $\text{mg}/\text{cm}^2$ );

M: Molar mass of  $\text{Co}_3\text{O}_4$  (241g/mol).

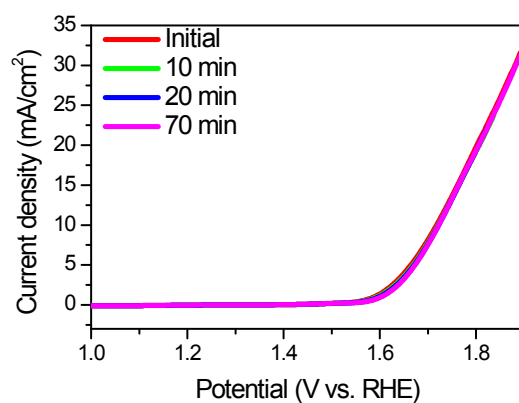

**Figure S1.** Linear sweep voltammograms of  $\text{Co}_3\text{O}_4$ -R after anodic oxidation at overpotential of 400 mV for different durations.
